# Supplementary material for: Transcriptomic and anatomic profiling reveal the germination process of different wheat varieties in response to waterlogging stress
Source: PubMed Central journal article supplement (PMC7456028; doi:10.1186/s12863-020-00901-y), 2020-08-28

A

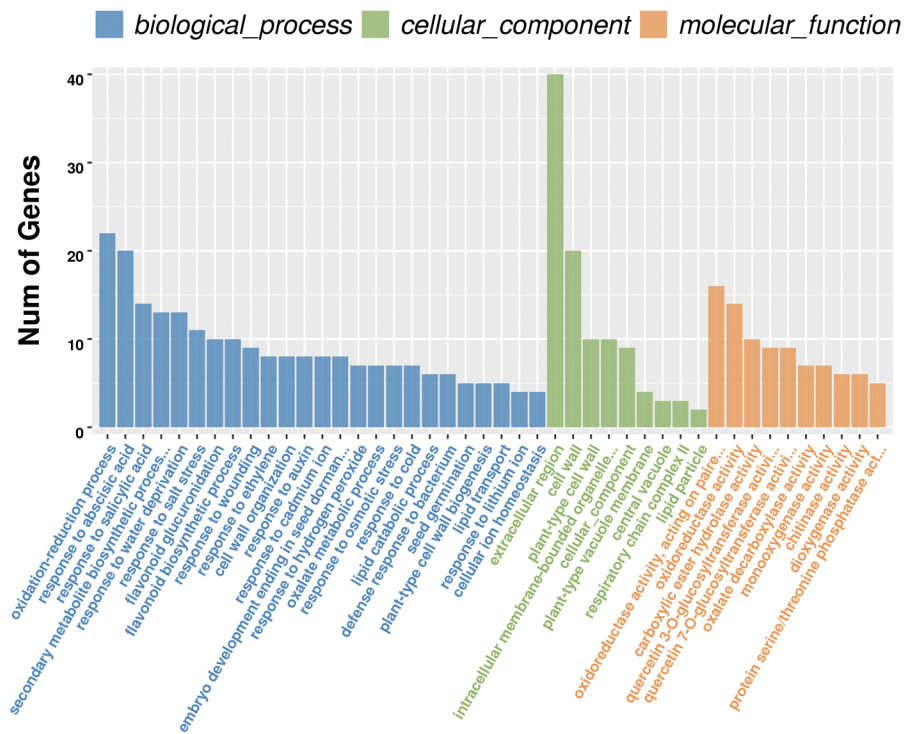

B

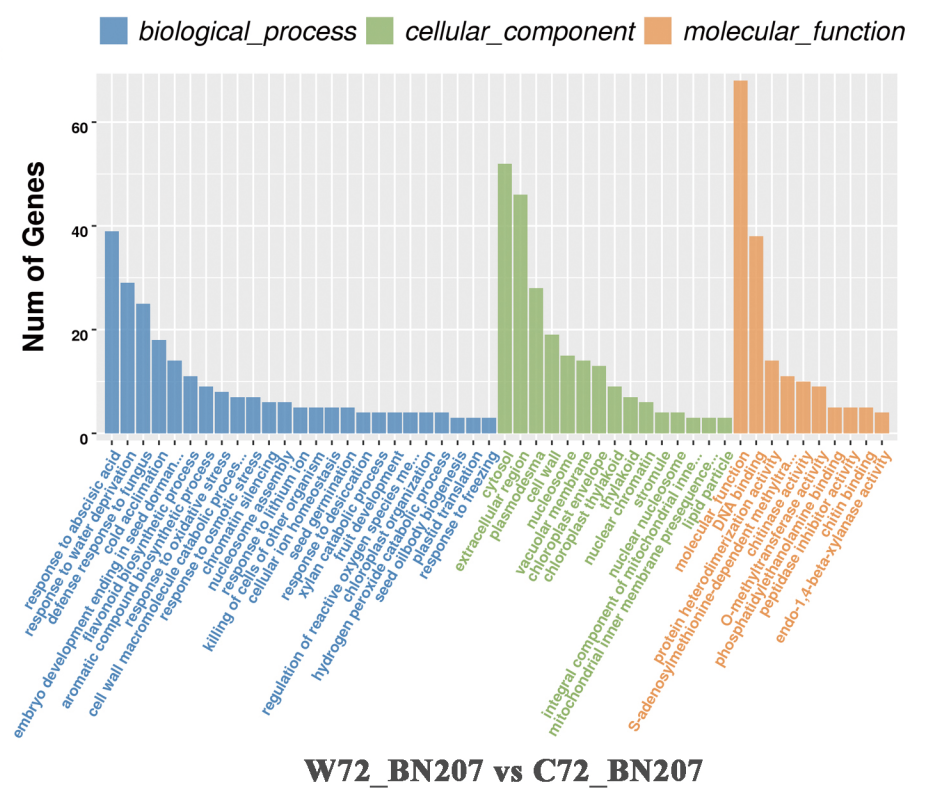

C

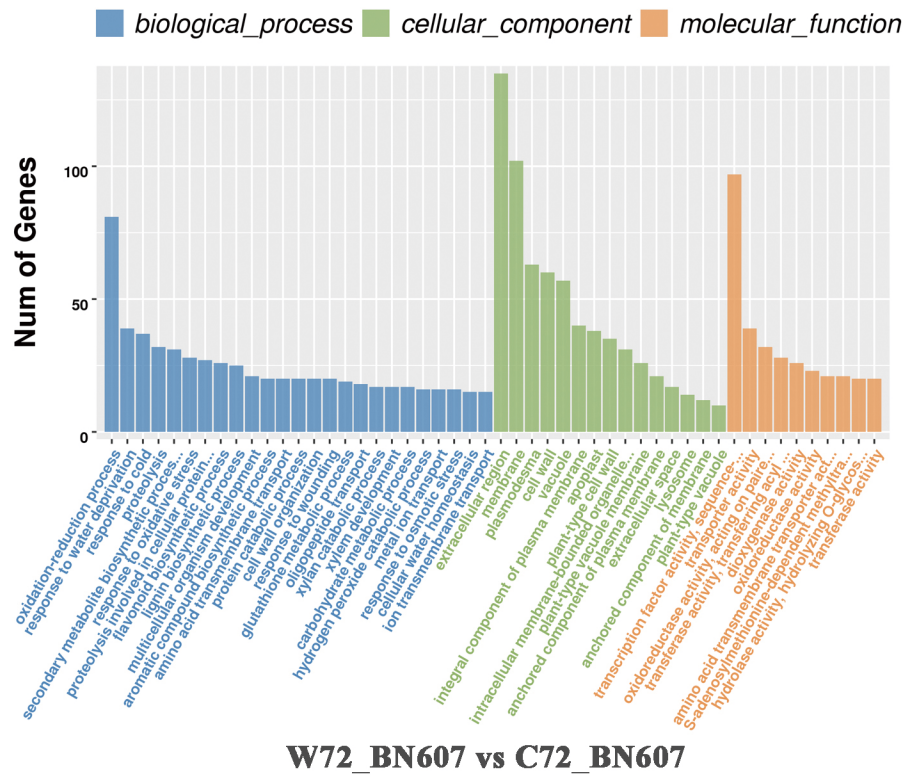

Supplement: 12863_2020_901_MOESM9_ESM.pdf [file 12863_2020_901_MOESM9_ESM.pdf]
