# Supplementary material for: Transcriptomic and anatomic profiling reveal the germination process of different wheat varieties in response to waterlogging stress
Source: PubMed Central journal article supplement (PMC7456028; doi:10.1186/s12863-020-00901-y), 2020-08-28

*ADH2*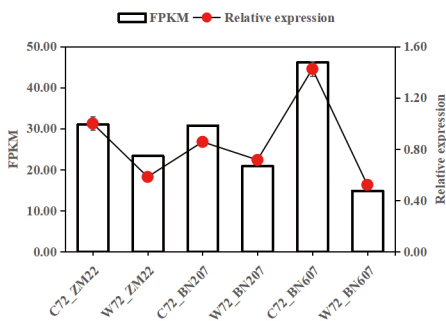*GT7*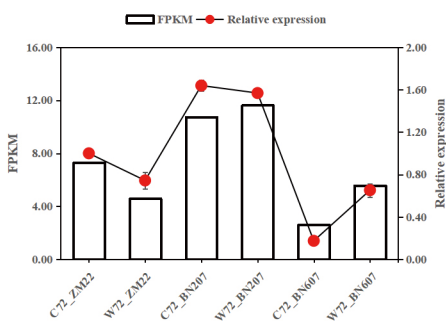*SSII-3*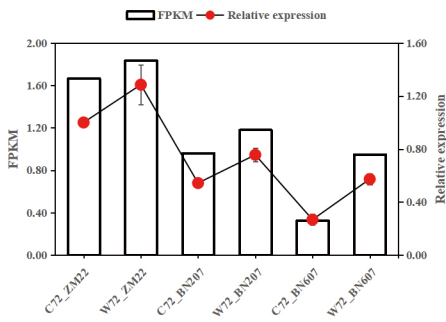*GAUT4*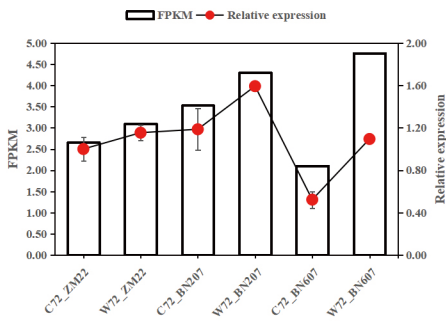*CRK10*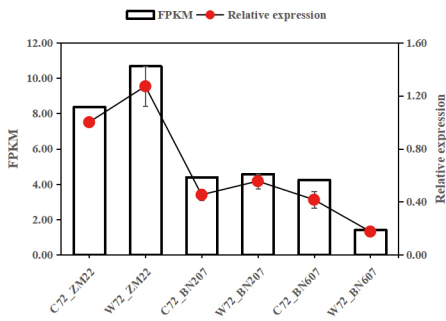*Cht4*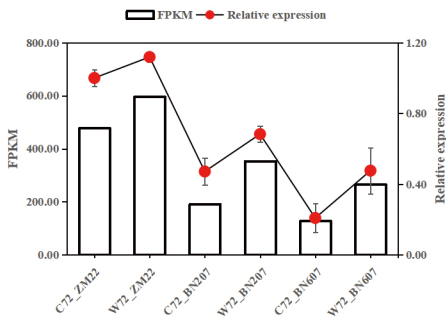*ASD1*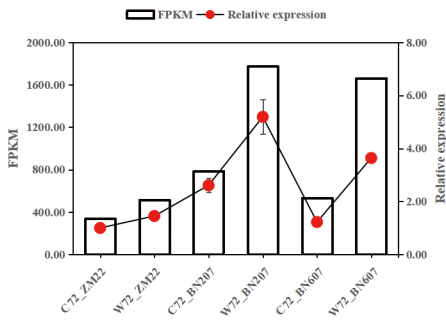*GUX1*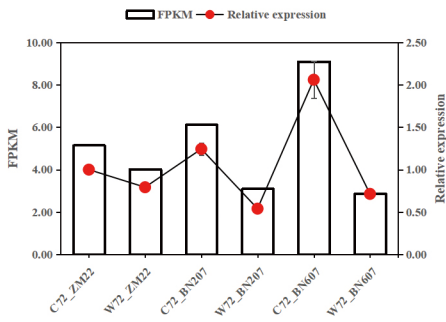*DGD11*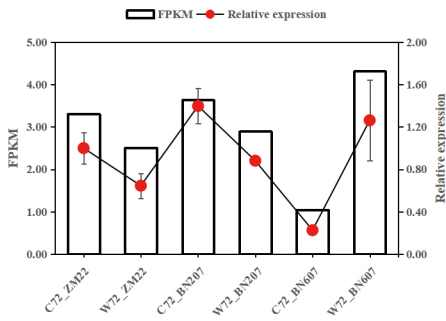*PAH1*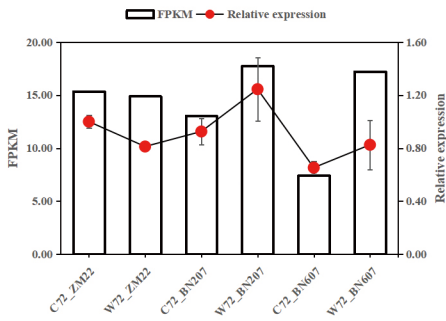

Supplement: 12863_2020_901_MOESM11_ESM.pdf [file 12863_2020_901_MOESM11_ESM.pdf]
